# Supplementary material for: Establishment and simulation of an electrode averaged model for a lithium-ion battery based on kinetic reactions
Source: Royal Society of Chemistry journal article supplement (doi:10.1039/c5ra27556c), 2016-01-01
Supplement: c5ra27556c1.pdf [file c5ra27556c1.pdf]

### “li-ion.in” file

460 ! lim, limit on number of iterations  
96.0d-06 ! h1, thickness of negative electrode (m)  
25.0d-06 ! h2, thickness of separator (m)  
60.0d-06 ! h3, thickness of positive electrode (m)  
10.0d-06 ! hcn, thickness of negative current collector (m)  
10.0d-06 ! hcp, thickness of positive current collector (m)  
40 ! n1, number of nodes in negative electrode (set=0 if in foil mode)  
40 ! n2, number of nodes in separator  
80 ! n3, number of nodes in positive electrode  
100 ! n4, number of nodes in solid particle  
0 ! mvdc1, flag for variable solid diff coeff in anode  
0 ! mvdc3, flag for variable solid diff coeff in cathode  
10 ! lims, number of iterations for solid phase convergence  
298.15 ! T temperature (K)  
1000.0 ! xi(1,1), initial salt concentration (mol/m<sup>3</sup>)  
0.593 ! x, initial stoichiometric parameter for neg. (ignored if n1=0)  
0.53 ! y, initial stoichiometric parameter for positive  
1.02d0 ! tmmax, maximum time step size (s)  
7.0d-14 ! dfs1, diffusion coef. in negative solid (m<sup>2</sup>/s)  
3.0d-14 ! dfs3, diffusion coef. in positive solid (m<sup>2</sup>/s)  
8.0d-6 ! Rad1, radius of negative particles (m)  
5.0d-6 ! Rad3, radius of positive particles (m)  
0.4 ! ep1, volume fraction of electrolyte in negative electrode  
0.0d0 ! epp1, volume fraction of polymer in negative electrode  
0.064 ! epf1, volume fraction of inert filler in negative electrode  
0.0d0 ! epg1, volume fraction of gas in negative  
0.4 ! ep2, ep2+epp2=1.0 volume fraction of electrolyte in separator  
0.0d0 ! epp2, volume fraction of polymer in separator  
0.0d0 ! epg2, volume fraction gas in separator  
0.36 ! ep3, volume fraction of electrolyte in positive electrode  
0.0d0 ! epp3, volume fraction of polymer in positive electrode  
0.106 ! epf3, volume fraction of inert filler in positive electrode  
0.0d0 ! epg3, volume fraction of gas in positive  
100.0d0 ! sig1, conductivity of negative matrix (S/m) (ignored in Foil mode)  
0.5d0 ! sig3, conductivity of positive matrix (S/m)  
3.0d-9 ! rka1, rate constant for negative reaction  
3.0d-9 ! rka3, rate constant for positive reaction  
0.35d-2 ! ranode, anode film resistance (ohm)  
0.000d0 ! rcathde, cathode film resistance (ohm)  
372.d0 ! cot1, coulombic capacity of negative material (mAh/g)  
274.d0 ! cot3, coulombic capacity of positive material (mAh/g)  
1324.0 ! re, density of electrolyte (kg/m<sup>3</sup>)  
1800.0 ! rs1, density of negative insertion material (kg/m<sup>3</sup>)

---

5010.0 ! rs3, density of positive insertion material (kg/m<sup>3</sup>)  
1800.0 ! rf, density of inert filler (kg/m<sup>3</sup>)  
1780.0 ! rpl, (not used here) density of polymer material (kg/m<sup>3</sup>)  
552d0 ! rc, density of inert separator material (kg/m<sup>3</sup>)  
8954.0 ! rcn ,density of negative current collector (kg/m<sup>3</sup>) [copper foil]  
2707.0 ! rcp, density of positive current collector (kg/m<sup>3</sup>) [aluminum foil]  
0.0d0 ! htc, heat-transfer coefficient at ends of cell stack (W/m<sup>2</sup>K)  
500.0d0 ! Cp, heat capacity of system (J/kg-K)  
298.15d0 ! Tam, ambient air temperature (K)  
1 ! ncell, number of cells in a cell stack  
0 ! lht, 0 uses htc, 1 cales htc, 2 isothermal  
1 ! il1, 1 for long print-out 0 for short print-out  
10 ! il2, prints every il2 th node in long print-out  
10 ! il3, prints every il3 th time step in long print-out  
1 ! lflag, 0 for electrolyte in separator only, 1 for uniform  
0 ! imp, 0 for no impedance, 1 for impedance  
0.0d0 ! capp1, capacitance of negative material (F/m<sup>2</sup>)  
0.0d0 ! capp3, capacitance of positive material (F/m<sup>2</sup>)  
0 ! lpow 0 for no power peaks, 1 for power peaks  
0 ! jsol calculate solid profiles if 1 < jsol < nj  
0 ! nside flag to turn on (1) or off (0) side reactions  
0.0d0 ! rksc1 rate constant side reaction 1 negative (ignored if nside=0)  
0.0d0 ! rksc1 rate constant side reaction 1 positive (ignored if nside=0)  
0.0d0 ! rksc2 rate constant side reaction 2 negative (ignored if nside=0)  
0.0d0 ! rksc2 rate constant side reaction 2 positive (ignored if nside=0)  
0.0d0 ! rksc3 rate constant side reaction 3 negative (ignored if nside=0)  
0.0d0 ! rksc3 rate constant side reaction 3 positive (ignored if nside=0)  
3 ! nneg see below  
11 ! nprop see below  
6 ! npos see below  
1 ! lcurs, number of current changes  
10.0d0 120.0d0 -3 0.0001d0 4.70d0

#### EXPLANATIONS

lines 20-22: ep1, epp1, and epf1

Set equal to 0.0 when running in Foil mode

line 50: il1

1 gives long print-out no matter if a run converges or not

The long print-out stops at t(nonconvergence).

0 gives short print-out if a run converges but a long  
print-out if the run does not converge.

line 59: lcurs, number of current changes

line 60 onward: cu(i), tt(i), mc(i), vcutlo(i), vcuthi(i)

cu(i) The ith value of the current (A/m<sup>2</sup>), potential (V), power (W/m<sup>2</sup>) or load of the segment

---

tt(i) The ith value of the time (min) or cutoff potential (V) of the segment

mc(i) The mode of the segment; 0 for potentiostatic, 1 for galvanostatic for a given time, 2 for galvanostatic to a cutoff potential, -1 for galvanostatic for a given time with a tapered current upon reaching a cutoff potential, -2 for specified power (in W/m<sup>2</sup>), and -3 for specified load

vcutlo(i) low voltage cutoff for current step

vcuthi(i) high voltage cutoff for current step

nneg:

- 1 ! Li foil
- 2 ! Carbon (petroleum coke)
- 3 ! MCMB 2528 graphite (Bellcore) ( $0.01 < x < 0.90$ )
- 4 ! TiS<sub>2</sub>
- 5 ! Tungsten oxide (Li<sub>x</sub>WO<sub>3</sub> with  $0 < x < 0.67$ )
- 6 ! Lonza KS6 graphite (Bellcore)
- 7 ! Albertus MH
- 8 ! Add your own negative electrode

nprop:

- 1 ! AsF<sub>6</sub> in methyl acetate
- 2 ! Perchlorate in PEO
- 3 ! Sodium Triflate in PEO
- 4 ! LiPF<sub>6</sub> in PC (Sony cell simulation)
- 5 ! Perchlorate in PC (West simulation)
- 6 ! Triflate in PEO
- 7 ! LiPF<sub>6</sub> in EC/DMC and p(VdF-HFP) (Bellcore)
- 8 ! LiPF<sub>6</sub> in EC/DMC and p(VdF-HFP) (Bellcore) cell #2
- 9 ! Ideal ion exchange membrane
- 10 ! TFSI in PEMO at 40 C (oxymethylene-linked PEO) (LBL)
- 11 ! LiPF<sub>6</sub> in EC:DMC (liquid)
- 12 ! LiTFSI in PEO at 85 C (LBL)
- 13 ! Paxton 30% KOH in H<sub>2</sub>O
- 14 ! Add your own electrolyte

npos:

- 1 ! TiS<sub>2</sub>
- 2 ! Spinel Mn<sub>2</sub>O<sub>4</sub> (lower plateau)
- 3 ! NaCoO<sub>2</sub>: Sodium cobalt oxide (P2 phase,  $0.3 < y < 0.92$ )
- 4 ! Spinel Mn<sub>2</sub>O<sub>4</sub> (upper plateau) ( $0.2 < y < 1.0$ )
- 5 ! Tungsten oxide (Li<sub>x</sub>WO<sub>3</sub> with  $0 < x < 0.67$ )
- 6 ! CoO<sub>2</sub> (Cobalt dioxide) ( $0.5 < y < 0.99$ )
- 7 ! V<sub>2</sub>O<sub>5</sub> (Vanadium oxide) ( $0 < y < 0.95$ )
- 8 ! Ni<sub>0.8</sub>Co<sub>0.2</sub>O<sub>2</sub> (Gen 1) ( $0.4 < y < 0.99$ )
- 9 ! Spinel Mn<sub>2</sub>O<sub>4</sub> (Bellcore)
- 10 ! V<sub>6</sub>O<sub>13</sub> (vanadium oxide) (Li<sub>y</sub>V<sub>0.167</sub>,  $0.05 < y < 1.0$ )
- 11 ! LiAl<sub>0.2</sub>Mn<sub>1.8</sub>O<sub>4</sub>F<sub>0.2</sub> (Bellcore doped spinel) ( $0.21 < y < 1.0$ )
- 12 ! Albertus NiOOH<sub>y</sub>
- 13 ! Add your own positive electrode

**'profiles.out' file**

| Distance<br>(microns) | C Elec<br>(mol/m <sup>3</sup> ) | C Sol Surf<br>x or y | Liq Pot<br>(V) | Solid Pot<br>(V) | Liq Cur<br>(A/m <sup>2</sup> ) | j main<br>(A/m <sup>2</sup> ) | j side 1<br>(A/m <sup>2</sup> ) | j side 2<br>(A/m <sup>2</sup> ) | j side 3<br>(A/m <sup>2</sup> ) |
|-----------------------|---------------------------------|----------------------|----------------|------------------|--------------------------------|-------------------------------|---------------------------------|---------------------------------|---------------------------------|
| t = 4.145296E-03 min  |                                 |                      |                |                  |                                |                               |                                 |                                 |                                 |
| 0.0,                  | 1000.3,                         | 0.7997,              | 0.302E-02,     | 0.180,           | 0.09646,                       | 0.6099E-5,                    | 0.000,                          | 0.000,                          | 0.000                           |
| 24.0,                 | 1000.3,                         | 0.7996,              | 0.293E-02,     | 0.180,           | 2.061,                         | 0.6597E-5,                    | 0.000,                          | 0.000,                          | 0.000                           |
| 48.0,                 | 1000.4,                         | 0.7996,              | 0.268E-02,     | 0.180,           | 4.237,                         | 0.7236E-5,                    | 0.000,                          | 0.000,                          | 0.000                           |
| 72.0,                 | 1000.5,                         | 0.7995,              | 0.222E-02,     | 0.180,           | 6.852,                         | 0.7985E-5,                    | 0.000,                          | 0.000,                          | 0.000                           |
| 96.0,                 | 1000.1,                         | 0.7993,              | 0.150E-02,     | 0.180,           | 10.00,                         | 0.8602E-5,                    | 0.000,                          | 0.000,                          | 0.000                           |
| 96.01,                | 1000.1,                         | 0.7993,              | 0.150E-02,     | 0.180,           | 10.00,                         | 0.000E-5,                     | 0.000,                          | 0.000,                          | 0.000                           |
| 102.2,                | 1000.0,                         | 0.0000,              | 0.144E-02,     | 0.000,           | 10.00,                         | 0.000E-5,                     | 0.000,                          | 0.000,                          | 0.000                           |
| 108.5,                | 1000.0,                         | 0.0000,              | 0.138E-02,     | 0.000,           | 10.00,                         | 0.000E-5,                     | 0.000,                          | 0.000,                          | 0.000                           |
| 114.7,                | 999.9,                          | 0.0000,              | 0.132E-02,     | 0.000,           | 10.00,                         | 0.000E-5,                     | 0.000,                          | 0.000,                          | 0.000                           |
| 120.9,                | 999.7,                          | 0.5007,              | 0.126E-02,     | 4.242,           | 9.886,                         | 0.000E-5,                     | 0.000,                          | 0.000,                          | 0.000                           |
| 121.0,                | 999.7,                          | 0.5007,              | 0.126E-02,     | 4.242,           | 9.886,                         | -1.274E-5,                    | 0.000,                          | 0.000,                          | 0.000                           |
| 128.5,                | 999.3,                          | 0.5004,              | 0.962E-03,     | 4.242,           | 8.018,                         | -1.123E-5,                    | 0.000,                          | 0.000,                          | 0.000                           |
| 136.0,                | 999.4,                          | 0.5003,              | 0.733E-03,     | 4.242,           | 6.698,                         | -9.570E-5,                    | 0.000,                          | 0.000,                          | 0.000                           |
| 143.5,                | 999.5,                          | 0.5002,              | 0.542E-03,     | 4.242,           | 5.293,                         | -7.910E-5,                    | 0.000,                          | 0.000,                          | 0.000                           |
| 151.0,                | 999.6,                          | 0.5002,              | 0.378E-03,     | 4.242,           | 4.232,                         | -5.881E-5,                    | 0.000,                          | 0.000,                          | 0.000                           |
| 158.5,                | 999.5,                          | 0.5002,              | 0.236E-03,     | 4.242,           | 3.374,                         | -5.233E-5,                    | 0.000,                          | 0.000,                          | 0.000                           |
| 166.0,                | 999.4,                          | 0.5003,              | 0.119E-03,     | 4.241,           | 2.376,                         | -5.389E-5,                    | 0.000,                          | 0.000,                          | 0.000                           |
| 173.5,                | 999.1,                          | 0.5004,              | 0.347E-04,     | 4.241,           | 1.083,                         | -6.054E-5,                    | 0.000,                          | 0.000,                          | 0.000                           |
| 181.0,                | 998.9,                          | 0.5006,              | 0.00           | 4.241,           | 0.000,                         | -8.038E-5,                    | 0.000,                          | 0.000,                          | 0.000                           |

| Distance<br>(microns) | C Elec<br>(mol/m <sup>3</sup> ) | C Sol Surf<br>x or y | Liq Pot<br>(V) | Solid Pot<br>(V) | Liq Cur<br>(A/m <sup>2</sup> ) | j main<br>(A/m <sup>2</sup> ) | j side 1<br>(A/m <sup>2</sup> ) | j side 2<br>(A/m <sup>2</sup> ) | j side 3<br>(A/m <sup>2</sup> ) |
|-----------------------|---------------------------------|----------------------|----------------|------------------|--------------------------------|-------------------------------|---------------------------------|---------------------------------|---------------------------------|
| t = 2.97796E+01 min   |                                 |                      |                |                  |                                |                               |                                 |                                 |                                 |
| 0.0,                  | 1032.6,                         | 0.6873,              | 0.513E-02,     | 0.185,           | 0.9822E-01,                    | 0.6572E-5,                    | 0.000,                          | 0.000,                          | 0.000                           |
| 24.0,                 | 1030.5,                         | 0.6816,              | 0.499E-02,     | 0.185,           | 2.098,                         | 0.6869E-5,                    | 0.000,                          | 0.000,                          | 0.000                           |
| 48.0,                 | 1024.2,                         | 0.6626,              | 0.455E-02,     | 0.185,           | 4.311,                         | 0.7192E-5,                    | 0.000,                          | 0.000,                          | 0.000                           |
| 72.0,                 | 1012.9,                         | 0.6262,              | 0.376E-02,     | 0.185,           | 6.977,                         | 0.7390E-5,                    | 0.000,                          | 0.000,                          | 0.000                           |
| 96.0,                 | 1000.8,                         | 0.5702,              | 0.254E-02,     | 0.185,           | 10.00,                         | 0.7495E-5,                    | 0.000,                          | 0.000,                          | 0.000                           |
| 96.01,                | 1000.8,                         | 0.5702,              | 0.254E-02,     | 0.185,           | 10.00,                         | 0.000E-5,                     | 0.000,                          | 0.000,                          | 0.000                           |
| 102.2,                | 998.9,                          | 0.0000,              | 0.244E-02,     | 0.000,           | 10.00,                         | 0.000E-5,                     | 0.000,                          | 0.000,                          | 0.000                           |
| 108.5,                | 996.1,                          | 0.0000,              | 0.234E-02,     | 0.000,           | 10.00,                         | 0.000E-5,                     | 0.000,                          | 0.000,                          | 0.000                           |
| 114.7,                | 993.8,                          | 0.0000,              | 0.225E-02,     | 0.000,           | 10.00,                         | 0.000E-5,                     | 0.000,                          | 0.000,                          | 0.000                           |
| 120.9,                | 991.5,                          | 0.6175,              | 0.215E-02,     | 4.049,           | 9.938,                         | 0.000E-5,                     | 0.000,                          | 0.000,                          | 0.000                           |
| 121.0,                | 991.5,                          | 0.6175,              | 0.215E-02,     | 4.049,           | 9.938,                         | -7.823E-5,                    | 0.000,                          | 0.000,                          | 0.000                           |
| 128.5,                | 983.5,                          | 0.6170,              | 0.165E-02,     | 4.049,           | 8.702,                         | -7.860E-5,                    | 0.000,                          | 0.000,                          | 0.000                           |
| 136.0,                | 977.5,                          | 0.6165,              | 0.121E-02,     | 4.049,           | 7.458,                         | -7.889E-5,                    | 0.000,                          | 0.000,                          | 0.000                           |
| 143.5,                | 972.5,                          | 0.6162,              | 0.844E-03,     | 4.049,           | 6.209,                         | -7.910E-5,                    | 0.000,                          | 0.000,                          | 0.000                           |
| 151.0,                | 968.4,                          | 0.6160,              | 0.540E-03,     | 4.048,           | 4.955,                         | -7.923E-5,                    | 0.000,                          | 0.000,                          | 0.000                           |
| 158.5,                | 965.2,                          | 0.6159,              | 0.304E-03,     | 4.048,           | 3.699,                         | -7.928E-5,                    | 0.000,                          | 0.000,                          | 0.000                           |
| 166.0,                | 962.9,                          | 0.6160,              | 0.135E-03,     | 4.048,           | 2.443,                         | -7.925E-5,                    | 0.000,                          | 0.000,                          | 0.000                           |

|        |        |         |            |          |       |            |        |        |       |
|--------|--------|---------|------------|----------|-------|------------|--------|--------|-------|
| 173.5, | 961.5, | 0.6161, | 0.337E-04, | 4.048,   | 1.188 | ,-7915E-5, | 0.000, | 0.000, | 0.000 |
| 181.0, | 961.1, | 0.6164, | 0.00       | , 4.048, | 0.000 | ,-7897E-5, | 0.000, | 0.000, | 0.000 |

| Distance<br>(microns) | C Elec<br>(mol/m3) | C Sol Surf<br>x or y | Liq Pot<br>(V) | Solid Pot<br>(V) | Liq Cur<br>(A/m2) | j main<br>(A/m2) | j side 1<br>(A/m2) | j side 2<br>(A/m2) | j side 3<br>(A/m2) |
|-----------------------|--------------------|----------------------|----------------|------------------|-------------------|------------------|--------------------|--------------------|--------------------|
|-----------------------|--------------------|----------------------|----------------|------------------|-------------------|------------------|--------------------|--------------------|--------------------|

t = 6.13142E+01 min

|        |         |         |            |          |         |            |        |        |       |
|--------|---------|---------|------------|----------|---------|------------|--------|--------|-------|
| 0.0,   | 1036.2, | 0.5012, | 0.537E-02, | 0.202,   | 0.1408, | 0.7838E-5, | 0.000, | 0.000, | 0.000 |
| 24.0,  | 1033.3, | 0.5006, | 0.518E-02, | 0.202,   | 2.905,  | 0.7567E-5, | 0.000, | 0.000, | 0.000 |
| 48.0,  | 1025.1, | 0.4990, | 0.461E-02, | 0.202,   | 5.461,  | 0.7210E-5, | 0.000, | 0.000, | 0.000 |
| 72.0,  | 1012.0, | 0.4967, | 0.369E-02, | 0.202,   | 7.831,  | 0.6602E-5, | 0.000, | 0.000, | 0.000 |
| 96.0,  | 1000.5, | 0.4939, | 0.244E-02, | 0.202,   | 10.00,  | 0.6095E-5, | 0.000, | 0.000, | 0.000 |
| 96.01, | 1000.5, | 0.4939, | 0.244E-02, | 0.202,   | 10.00,  | 0.000E-5,  | 0.000, | 0.000, | 0.000 |
| 102.2, | 998.5,  | 0.0000, | 0.235E-02, | 0.000,   | 10.00,  | 0.000E-5,  | 0.000, | 0.000, | 0.000 |
| 108.5, | 995.7,  | 0.0000, | 0.226E-02, | 0.000,   | 10.00,  | 0.000E-5,  | 0.000, | 0.000, | 0.000 |
| 114.7, | 993.4,  | 0.0000, | 0.216E-02, | 0.000,   | 10.00,  | 0.000E-5,  | 0.000, | 0.000, | 0.000 |
| 120.9, | 991.4,  | 0.7378, | 0.207E-02, | 3.944,   | 9.936,  | 0.000E-5,  | 0.000, | 0.000, | 0.000 |
| 121.0, | 991.4,  | 0.7378, | 0.207E-02, | 3.944,   | 9.936,  | -8017E-5,  | 0.000, | 0.000, | 0.000 |
| 128.5, | 982.7,  | 0.7369, | 0.159E-02, | 3.944,   | 8.666,  | -7961E-5,  | 0.000, | 0.000, | 0.000 |
| 136.0, | 976.9,  | 0.7361, | 0.117E-02, | 3.944,   | 7.408,  | -7918E-5,  | 0.000, | 0.000, | 0.000 |
| 143.5, | 972.1,  | 0.7356, | 0.811E-03, | 3.944,   | 6.158,  | -7888E-5,  | 0.000, | 0.000, | 0.000 |
| 151.0, | 968.1,  | 0.7353, | 0.519E-03, | 3.944,   | 4.914,  | -7870E-5,  | 0.000, | 0.000, | 0.000 |
| 158.5, | 965.0,  | 0.7352, | 0.293E-03, | 3.943,   | 3.673,  | -7864E-5,  | 0.000, | 0.000, | 0.000 |
| 166.0, | 962.8,  | 0.7353, | 0.130E-03, | 3.943,   | 2.431,  | -7869E-5,  | 0.000, | 0.000, | 0.000 |
| 173.5, | 961.5,  | 0.7355, | 0.326E-04, | 3.943,   | 1.187,  | -7886E-5,  | 0.000, | 0.000, | 0.000 |
| 181.0, | 961.1,  | 0.7360, | 0.00       | , 3.943, | 0.000,  | -7915E-5,  | 0.000, | 0.000, | 0.000 |

| Distance<br>(microns) | C Elec<br>(mol/m3) | C Sol Surf<br>x or y | Liq Pot<br>(V) | Solid Pot<br>(V) | Liq Cur<br>(A/m2) | j main<br>(A/m2) | j side 1<br>(A/m2) | j side 2<br>(A/m2) | j side 3<br>(A/m2) |
|-----------------------|--------------------|----------------------|----------------|------------------|-------------------|------------------|--------------------|--------------------|--------------------|
|-----------------------|--------------------|----------------------|----------------|------------------|-------------------|------------------|--------------------|--------------------|--------------------|

t = 8.93450E+01 min

|        |         |         |            |        |         |            |        |        |       |
|--------|---------|---------|------------|--------|---------|------------|--------|--------|-------|
| 0.0,   | 1030.6, | 0.3801, | 0.480E-02, | 0.221, | 0.1018, | 0.6421E-5, | 0.000, | 0.000, | 0.000 |
| 24.0,  | 1028.6, | 0.3775, | 0.466E-02, | 0.221, | 2.156,  | 0.6821E-5, | 0.000, | 0.000, | 0.000 |
| 48.0,  | 1022.5, | 0.3690, | 0.424E-02, | 0.221, | 4.324,  | 0.7222E-5, | 0.000, | 0.000, | 0.000 |
| 72.0,  | 1012.0, | 0.3520, | 0.349E-02, | 0.221, | 6.809,  | 0.7777E-5, | 0.000, | 0.000, | 0.000 |
| 96.0,  | 1000.1, | 0.3184, | 0.236E-02, | 0.221, | 10.00,  | 0.8204E-5, | 0.000, | 0.000, | 0.000 |
| 96.01, | 1000.1, | 0.3184, | 0.236E-02, | 0.221, | 10.00,  | 0.000E-5,  | 0.000, | 0.000, | 0.000 |
| 102.2, | 998.0,  | 0.0000, | 0.227E-02, | 0.000, | 10.00,  | 0.000E-5,  | 0.000, | 0.000, | 0.000 |
| 108.5, | 995.2,  | 0.0000, | 0.218E-02, | 0.000, | 10.00,  | 0.000E-5,  | 0.000, | 0.000, | 0.000 |
| 114.7, | 993.0,  | 0.0000, | 0.209E-02, | 0.000, | 10.00,  | 0.000E-5,  | 0.000, | 0.000, | 0.000 |
| 120.9, | 991.1,  | 0.8502, | 0.200E-02, | 3.915, | 9.931,  | 0.000E-5,  | 0.000, | 0.000, | 0.000 |
| 121.0, | 991.1,  | 0.8502, | 0.200E-02, | 3.915, | 9.931,  | -8581E-5,  | 0.000, | 0.000, | 0.000 |
| 128.5, | 984.5,  | 0.8461, | 0.153E-02, | 3.915, | 8.584,  | -8274E-5,  | 0.000, | 0.000, | 0.000 |
| 136.0, | 979.0,  | 0.8431, | 0.112E-02, | 3.915, | 7.298,  | -7964E-5,  | 0.000, | 0.000, | 0.000 |
| 143.5, | 974.3,  | 0.8411, | 0.781E-03, | 3.915, | 6.053,  | -7826E-5,  | 0.000, | 0.000, | 0.000 |
| 151.0, | 970.5,  | 0.8399, | 0.502E-03, | 3.914, | 4.832,  | -7979E-5,  | 0.000, | 0.000, | 0.000 |

|        |        |         |            |        |        |            |        |        |       |
|--------|--------|---------|------------|--------|--------|------------|--------|--------|-------|
| 158.5, | 967.5, | 0.8394, | 0.284E-03, | 3.914, | 3.623, | -.7956E-5, | 0.000, | 0.000, | 0.000 |
| 166.0, | 965.4, | 0.8398, | 0.127E-03, | 3.914, | 2.412, | -.7934E-5, | 0.000, | 0.000, | 0.000 |
| 173.5, | 964.1, | 0.8410, | 0.320E-04, | 3.914, | 1.188, | -.7916E-5, | 0.000, | 0.000, | 0.000 |
| 181.0, | 963.7, | 0.8430, | 0.00,      | 3.914, | 0.000, | -.7909E-5, | 0.000, | 0.000, | 0.000 |

| Distance<br>(microns) | C Elec<br>(mol/m3) | C Sol Surf<br>x or y | Liq Pot<br>(V) | Solid Pot<br>(V) | Liq Cur<br>(A/m2) | j main<br>(A/m2) | j side 1<br>(A/m2) | j side 2<br>(A/m2) | j side 3<br>(A/m2) |
|-----------------------|--------------------|----------------------|----------------|------------------|-------------------|------------------|--------------------|--------------------|--------------------|
|-----------------------|--------------------|----------------------|----------------|------------------|-------------------|------------------|--------------------|--------------------|--------------------|

t = 1.173758E+02 min

|        |         |         |            |        |         |            |        |        |       |
|--------|---------|---------|------------|--------|---------|------------|--------|--------|-------|
| 0.0,   | 1035.2, | 0.2303, | 0.532E-02, | 0.236, | 0.1437, | 0.8657E-5, | 0.000, | 0.000, | 0.000 |
| 24.0,  | 1032.5, | 0.2296, | 0.513E-02, | 0.236, | 2.966,  | 0.7887E-5, | 0.000, | 0.000, | 0.000 |
| 48.0,  | 1024.5, | 0.2278, | 0.457E-02, | 0.236, | 5.566,  | 0.7242E-5, | 0.000, | 0.000, | 0.000 |
| 72.0,  | 1011.8, | 0.2253, | 0.368E-02, | 0.236, | 7.922,  | 0.6400E-5, | 0.000, | 0.000, | 0.000 |
| 96.0,  | 1000.0, | 0.2223, | 0.248E-02, | 0.236, | 10.00,  | 0.5702E-5, | 0.000, | 0.000, | 0.000 |
| 96.01, | 1000.0, | 0.2223, | 0.248E-02, | 0.236, | 10.00,  | 0.000E-5,  | 0.000, | 0.000, | 0.000 |
| 102.2, | 997.7,  | 0.0000, | 0.239E-02, | 0.000, | 10.00,  | 0.000E-5,  | 0.000, | 0.000, | 0.000 |
| 108.5, | 994.9,  | 0.0000, | 0.230E-02, | 0.000, | 10.00,  | 0.000E-5,  | 0.000, | 0.000, | 0.000 |
| 114.7, | 992.6,  | 0.0000, | 0.221E-02, | 0.000, | 10.00,  | 0.000E-5,  | 0.000, | 0.000, | 0.000 |
| 120.9, | 990.8,  | 0.9596, | 0.212E-02, | 3.908, | 9.968,  | 0.000E-5,  | 0.000, | 0.000, | 0.000 |
| 121.0, | 990.8,  | 0.9596, | 0.212E-02, | 3.908, | 9.968,  | -.5667E-5, | 0.000, | 0.000, | 0.000 |
| 128.5, | 983.4,  | 0.9561, | 0.165E-02, | 3.908, | 9.198,  | -.6485E-5, | 0.000, | 0.000, | 0.000 |
| 136.0, | 977.5,  | 0.9519, | 0.121E-02, | 3.908, | 8.158,  | -.7250E-5, | 0.000, | 0.000, | 0.000 |
| 143.5, | 972.4,  | 0.9476, | 0.834E-03, | 3.908, | 6.864,  | -.7949E-5, | 0.000, | 0.000, | 0.000 |
| 151.0, | 968.2,  | 0.9442, | 0.524E-03, | 3.908, | 5.423,  | -.8530E-5, | 0.000, | 0.000, | 0.000 |
| 158.5, | 965.0,  | 0.9427, | 0.287E-03, | 3.907, | 3.944,  | -.8629E-5, | 0.000, | 0.000, | 0.000 |
| 166.0, | 962.7,  | 0.9434, | 0.123E-03, | 3.907, | 2.497,  | -.8205E-5, | 0.000, | 0.000, | 0.000 |
| 173.5, | 961.5,  | 0.9461, | 0.291E-04, | 3.907, | 1.137,  | -.7909E-5, | 0.000, | 0.000, | 0.000 |
| 181.0, | 961.1,  | 0.9499, | 0.00,      | 3.907, | 0.000,  | -.7633E-5, | 0.000, | 0.000, | 0.000 |

### 'dualfoil5.out' file

| Time<br>(min) | Util N<br>x | Util P<br>y | Cell Pot<br>(V) | Uocp<br>(V) | Curr<br>(A/m2) | Temp<br>(C) | heatgen<br>(W/m2) |
|---------------|-------------|-------------|-----------------|-------------|----------------|-------------|-------------------|
| 0.000,        | 0.5930,     | 0.5300,     | 4.00325,        | 4.00893,    | 10.00,         | 24.85,      | 0.06,             |
| 0.001,        | 0.5930,     | 0.5300,     | 4.00312,        | 4.00892,    | 10.00,         | 24.85,      | 0.06,             |
| 0.001,        | 0.5930,     | 0.5300,     | 4.00303,        | 4.00892,    | 10.00,         | 24.85,      | 0.06,             |
| 0.001,        | 0.5930,     | 0.5300,     | 4.00295,        | 4.00892,    | 10.00,         | 24.85,      | 0.06,             |
| 0.002,        | 0.5930,     | 0.5300,     | 4.00287,        | 4.00891,    | 10.00,         | 24.85,      | 0.06,             |
| 0.002,        | 0.5930,     | 0.5300,     | 4.00280,        | 4.00891,    | 10.00,         | 24.85,      | 0.06,             |
| 0.003,        | 0.5930,     | 0.5300,     | 4.00273,        | 4.00890,    | 10.00,         | 24.85,      | 0.06,             |
| 0.003,        | 0.5930,     | 0.5300,     | 4.00266,        | 4.00890,    | 10.00,         | 24.85,      | 0.06,             |
| 0.004,        | 0.5930,     | 0.5300,     | 4.00259,        | 4.00889,    | 10.00,         | 24.85,      | 0.06,             |
| 0.005,        | 0.5930,     | 0.5300,     | 4.00252,        | 4.00889,    | 10.00,         | 24.85,      | 0.06,             |
| 0.006,        | 0.5930,     | 0.5300,     | 4.00245,        | 4.00888,    | 10.00,         | 24.85,      | 0.06,             |
| 0.007,        | 0.5930,     | 0.5300,     | 4.00238,        | 4.00887,    | 10.00,         | 24.85,      | 0.06,             |
| 0.007,        | 0.5930,     | 0.5300,     | 4.00231,        | 4.00887,    | 10.00,         | 24.85,      | 0.07,             |

---

|                        |          |          |        |        |       |
|------------------------|----------|----------|--------|--------|-------|
| 0.009, 0.5930, 0.5300, | 4.00223, | 4.00886, | 10.00, | 24.85, | 0.07, |
| 0.010, 0.5930, 0.5300, | 4.00216, | 4.00885, | 10.00, | 24.85, | 0.07, |
| 0.011, 0.5929, 0.5300, | 4.00208, | 4.00884, | 10.00, | 24.85, | 0.07, |
| 0.012, 0.5929, 0.5300, | 4.00199, | 4.00883, | 10.00, | 24.85, | 0.07, |
| 0.014, 0.5929, 0.5301, | 4.00191, | 4.00881, | 10.00, | 24.85, | 0.07, |
| 0.016, 0.5929, 0.5301, | 4.00182, | 4.00880, | 10.00, | 24.85, | 0.07, |
| 0.017, 0.5929, 0.5301, | 4.00172, | 4.00878, | 10.00, | 24.85, | 0.07, |
| 0.019, 0.5929, 0.5301, | 4.00163, | 4.00877, | 10.00, | 24.85, | 0.07, |
| 0.022, 0.5929, 0.5301, | 4.00153, | 4.00875, | 10.00, | 24.85, | 0.07, |
| 0.024, 0.5929, 0.5301, | 4.00142, | 4.00873, | 10.00, | 24.85, | 0.07, |
| 0.027, 0.5929, 0.5301, | 4.00131, | 4.00870, | 10.00, | 24.85, | 0.07, |
| 0.030, 0.5929, 0.5301, | 4.00120, | 4.00868, | 10.00, | 24.85, | 0.07, |
| 0.033, 0.5928, 0.5301, | 4.00108, | 4.00865, | 10.00, | 24.85, | 0.08, |
| 0.037, 0.5928, 0.5301, | 4.00095, | 4.00862, | 10.00, | 24.85, | 0.08, |
| 0.041, 0.5928, 0.5302, | 4.00082, | 4.00859, | 10.00, | 24.85, | 0.08, |
| 0.045, 0.5928, 0.5302, | 4.00069, | 4.00856, | 10.00, | 24.85, | 0.08, |
| 0.050, 0.5928, 0.5302, | 4.00054, | 4.00852, | 10.00, | 24.85, | 0.08, |
| 0.055, 0.5927, 0.5302, | 4.00040, | 4.00847, | 10.00, | 24.85, | 0.08, |
| 0.061, 0.5927, 0.5302, | 4.00024, | 4.00843, | 10.00, | 24.85, | 0.08, |
| 0.067, 0.5927, 0.5303, | 4.00008, | 4.00837, | 10.00, | 24.85, | 0.08, |
| 0.074, 0.5926, 0.5303, | 3.99991, | 4.00832, | 10.00, | 24.85, | 0.08, |
| 0.082, 0.5926, 0.5303, | 3.99973, | 4.00826, | 10.00, | 24.85, | 0.09, |
| 0.091, 0.5926, 0.5303, | 3.99955, | 4.00819, | 10.00, | 24.85, | 0.09, |
| 0.100, 0.5925, 0.5304, | 3.99936, | 4.00812, | 10.00, | 24.85, | 0.09, |
| 0.110, 0.5925, 0.5304, | 3.99916, | 4.00804, | 10.00, | 24.85, | 0.09, |
| 0.122, 0.5924, 0.5305, | 3.99896, | 4.00795, | 10.00, | 24.85, | 0.09, |
| 0.134, 0.5924, 0.5305, | 3.99875, | 4.00785, | 10.00, | 24.85, | 0.09, |
| 0.148, 0.5923, 0.5306, | 3.99853, | 4.00775, | 10.00, | 24.85, | 0.09, |
| 0.163, 0.5922, 0.5306, | 3.99830, | 4.00764, | 10.00, | 24.85, | 0.09, |
| 0.180, 0.5921, 0.5307, | 3.99806, | 4.00751, | 10.00, | 24.85, | 0.09, |
| 0.198, 0.5920, 0.5307, | 3.99782, | 4.00738, | 10.00, | 24.85, | 0.10, |
| 0.218, 0.5919, 0.5308, | 3.99757, | 4.00724, | 10.00, | 24.85, | 0.10, |
| 0.240, 0.5918, 0.5309, | 3.99732, | 4.00708, | 10.00, | 24.86, | 0.10, |
| 0.264, 0.5917, 0.5310, | 3.99706, | 4.00691, | 10.00, | 24.86, | 0.10, |
| 0.291, 0.5916, 0.5311, | 3.99679, | 4.00673, | 10.00, | 24.86, | 0.10, |
| 0.320, 0.5915, 0.5312, | 3.99652, | 4.00654, | 10.00, | 24.86, | 0.10, |
| 0.353, 0.5913, 0.5313, | 3.99625, | 4.00633, | 10.00, | 24.86, | 0.10, |
| 0.388, 0.5911, 0.5315, | 3.99597, | 4.00610, | 10.00, | 24.86, | 0.10, |
| 0.427, 0.5909, 0.5316, | 3.99569, | 4.00586, | 10.00, | 24.86, | 0.10, |
| 0.470, 0.5907, 0.5318, | 3.99541, | 4.00561, | 10.00, | 24.86, | 0.10, |
| 0.518, 0.5905, 0.5320, | 3.99513, | 4.00534, | 10.00, | 24.86, | 0.10, |
| 0.570, 0.5902, 0.5322, | 3.99484, | 4.00505, | 10.00, | 24.86, | 0.10, |
| 0.627, 0.5900, 0.5324, | 3.99456, | 4.00476, | 10.00, | 24.86, | 0.10, |
| 0.690, 0.5897, 0.5326, | 3.99427, | 4.00444, | 10.00, | 24.87, | 0.10, |

---

|                         |          |          |        |        |       |
|-------------------------|----------|----------|--------|--------|-------|
| 0.760, 0.5893, 0.5329,  | 3.99399, | 4.00411, | 10.00, | 24.87, | 0.10, |
| 0.836, 0.5890, 0.5332,  | 3.99370, | 4.00377, | 10.00, | 24.87, | 0.10, |
| 0.920, 0.5886, 0.5335,  | 3.99341, | 4.00342, | 10.00, | 24.87, | 0.10, |
| 1.012, 0.5881, 0.5338,  | 3.99311, | 4.00306, | 10.00, | 24.87, | 0.10, |
| 1.113, 0.5876, 0.5342,  | 3.99281, | 4.00269, | 10.00, | 24.88, | 0.10, |
| 1.225, 0.5871, 0.5346,  | 3.99249, | 4.00231, | 10.00, | 24.88, | 0.10, |
| 1.348, 0.5865, 0.5351,  | 3.99216, | 4.00192, | 10.00, | 24.88, | 0.10, |
| 1.483, 0.5858, 0.5356,  | 3.99181, | 4.00153, | 10.00, | 24.89, | 0.10, |
| 1.632, 0.5851, 0.5362,  | 3.99144, | 4.00113, | 10.00, | 24.89, | 0.10, |
| 1.795, 0.5843, 0.5368,  | 3.99103, | 4.00071, | 10.00, | 24.89, | 0.10, |
| 1.975, 0.5834, 0.5375,  | 3.99057, | 4.00028, | 10.00, | 24.90, | 0.10, |
| 2.173, 0.5825, 0.5382,  | 3.99005, | 3.99982, | 10.00, | 24.90, | 0.10, |
| 2.390, 0.5814, 0.5391,  | 3.98944, | 3.99933, | 10.00, | 24.91, | 0.10, |
| 2.629, 0.5803, 0.5400,  | 3.98874, | 3.99878, | 10.00, | 24.91, | 0.10, |
| 2.893, 0.5790, 0.5410,  | 3.98789, | 3.99816, | 10.00, | 24.92, | 0.10, |
| 3.182, 0.5776, 0.5421,  | 3.98685, | 3.99743, | 10.00, | 24.93, | 0.11, |
| 3.501, 0.5761, 0.5433,  | 3.98558, | 3.99654, | 10.00, | 24.93, | 0.11, |
| 3.851, 0.5744, 0.5446,  | 3.98398, | 3.99544, | 10.00, | 24.94, | 0.11, |
| 4.202, 0.5727, 0.5459,  | 3.98216, | 3.99418, | 10.00, | 24.95, | 0.12, |
| 4.552, 0.5710, 0.5472,  | 3.98008, | 3.99274, | 10.00, | 24.97, | 0.13, |
| 4.902, 0.5693, 0.5486,  | 3.97774, | 3.99108, | 10.00, | 24.98, | 0.13, |
| 5.253, 0.5676, 0.5499,  | 3.97512, | 3.98919, | 10.00, | 24.99, | 0.14, |
| 5.603, 0.5659, 0.5512,  | 3.97219, | 3.98705, | 10.00, | 25.00, | 0.15, |
| 5.954, 0.5642, 0.5526,  | 3.96897, | 3.98462, | 10.00, | 25.01, | 0.16, |
| 6.304, 0.5625, 0.5539,  | 3.96545, | 3.98191, | 10.00, | 25.03, | 0.16, |
| 6.654, 0.5608, 0.5552,  | 3.96165, | 3.97890, | 10.00, | 25.04, | 0.17, |
| 7.005, 0.5591, 0.5565,  | 3.95758, | 3.97560, | 10.00, | 25.06, | 0.18, |
| 7.355, 0.5574, 0.5579,  | 3.95328, | 3.97200, | 10.00, | 25.07, | 0.19, |
| 7.705, 0.5557, 0.5592,  | 3.94876, | 3.96812, | 10.00, | 25.09, | 0.19, |
| 8.056, 0.5540, 0.5605,  | 3.94409, | 3.96399, | 10.00, | 25.11, | 0.20, |
| 8.406, 0.5523, 0.5619,  | 3.93931, | 3.95963, | 10.00, | 25.12, | 0.20, |
| 8.757, 0.5506, 0.5632,  | 3.93447, | 3.95507, | 10.00, | 25.14, | 0.21, |
| 9.107, 0.5489, 0.5645,  | 3.92961, | 3.95038, | 10.00, | 25.16, | 0.21, |
| 9.457, 0.5473, 0.5658,  | 3.92480, | 3.94558, | 10.00, | 25.18, | 0.21, |
| 9.808, 0.5456, 0.5672,  | 3.92008, | 3.94075, | 10.00, | 25.20, | 0.21, |
| 10.158, 0.5439, 0.5685, | 3.91549, | 3.93592, | 10.00, | 25.21, | 0.20, |
| 10.509, 0.5422, 0.5698, | 3.91107, | 3.93115, | 10.00, | 25.23, | 0.20, |
| 10.859, 0.5405, 0.5711, | 3.90684, | 3.92648, | 10.00, | 25.25, | 0.20, |
| 11.209, 0.5388, 0.5725, | 3.90283, | 3.92196, | 10.00, | 25.26, | 0.19, |
| 11.560, 0.5371, 0.5738, | 3.89905, | 3.91761, | 10.00, | 25.28, | 0.19, |
| 11.910, 0.5354, 0.5751, | 3.89549, | 3.91347, | 10.00, | 25.29, | 0.18, |
| 12.260, 0.5337, 0.5765, | 3.89217, | 3.90954, | 10.00, | 25.31, | 0.17, |
| 12.611, 0.5320, 0.5778, | 3.88906, | 3.90584, | 10.00, | 25.32, | 0.17, |
| 12.961, 0.5303, 0.5791, | 3.88616, | 3.90236, | 10.00, | 25.34, | 0.16, |



---

|                                                               |
|---------------------------------------------------------------|
| 13.312, 0.5286, 0.5804, 3.88344, 3.89911, 10.00, 25.35, 0.16, |
| 13.662, 0.5269, 0.5818, 3.88090, 3.89607, 10.00, 25.36, 0.15, |
| 14.012, 0.5252, 0.5831, 3.87851, 3.89323, 10.00, 25.38, 0.15, |
| 14.363, 0.5235, 0.5844, 3.87625, 3.89058, 10.00, 25.39, 0.14, |
| 14.713, 0.5218, 0.5858, 3.87410, 3.88808, 10.00, 25.40, 0.14, |
| 15.064, 0.5201, 0.5871, 3.87205, 3.88573, 10.00, 25.41, 0.14, |
| 15.414, 0.5184, 0.5884, 3.87007, 3.88350, 10.00, 25.42, 0.14, |
| 15.764, 0.5167, 0.5897, 3.86816, 3.88138, 10.00, 25.43, 0.13, |
| 16.115, 0.5150, 0.5911, 3.86629, 3.87935, 10.00, 25.45, 0.13, |
| 16.465, 0.5134, 0.5924, 3.86446, 3.87739, 10.00, 25.46, 0.13, |
| 16.815, 0.5117, 0.5937, 3.86266, 3.87548, 10.00, 25.47, 0.13, |
| 17.166, 0.5100, 0.5950, 3.86087, 3.87362, 10.00, 25.48, 0.13, |
| 17.516, 0.5083, 0.5964, 3.85910, 3.87179, 10.00, 25.49, 0.13, |
| 17.867, 0.5066, 0.5977, 3.85733, 3.86999, 10.00, 25.50, 0.13, |
| 18.217, 0.5049, 0.5990, 3.85556, 3.86819, 10.00, 25.51, 0.13, |
| 18.567, 0.5032, 0.6004, 3.85379, 3.86641, 10.00, 25.52, 0.13, |
| 18.918, 0.5015, 0.6017, 3.85202, 3.86463, 10.00, 25.53, 0.13, |
| 19.268, 0.4998, 0.6030, 3.85025, 3.86285, 10.00, 25.54, 0.13, |
| 19.619, 0.4981, 0.6043, 3.84847, 3.86107, 10.00, 25.55, 0.13, |
| 19.969, 0.4964, 0.6057, 3.84669, 3.85929, 10.00, 25.57, 0.13, |
| 20.319, 0.4947, 0.6070, 3.84490, 3.85750, 10.00, 25.58, 0.13, |
| 20.670, 0.4930, 0.6083, 3.84312, 3.85571, 10.00, 25.59, 0.13, |
| 21.020, 0.4913, 0.6097, 3.84134, 3.85391, 10.00, 25.60, 0.13, |
| 21.370, 0.4896, 0.6110, 3.83955, 3.85211, 10.00, 25.61, 0.13, |
| 21.721, 0.4879, 0.6123, 3.83777, 3.85031, 10.00, 25.62, 0.13, |
| 22.071, 0.4862, 0.6136, 3.83599, 3.84851, 10.00, 25.63, 0.13, |
| 22.422, 0.4845, 0.6150, 3.83422, 3.84672, 10.00, 25.64, 0.12, |
| 22.772, 0.4828, 0.6163, 3.83245, 3.84492, 10.00, 25.65, 0.12, |
| 23.122, 0.4812, 0.6176, 3.83069, 3.84313, 10.00, 25.66, 0.12, |
| 23.473, 0.4795, 0.6189, 3.82893, 3.84134, 10.00, 25.67, 0.12, |
| 23.823, 0.4778, 0.6203, 3.82718, 3.83955, 10.00, 25.68, 0.12, |
| 24.174, 0.4761, 0.6216, 3.82544, 3.83778, 10.00, 25.69, 0.12, |
| 24.524, 0.4744, 0.6229, 3.82371, 3.83601, 10.00, 25.70, 0.12, |
| 24.874, 0.4727, 0.6243, 3.82198, 3.83424, 10.00, 25.71, 0.12, |
| 25.225, 0.4710, 0.6256, 3.82026, 3.83249, 10.00, 25.72, 0.12, |
| 25.575, 0.4693, 0.6269, 3.81855, 3.83074, 10.00, 25.73, 0.12, |
| 25.925, 0.4676, 0.6282, 3.81684, 3.82900, 10.00, 25.75, 0.12, |
| 26.276, 0.4659, 0.6296, 3.81515, 3.82727, 10.00, 25.76, 0.12, |
| 26.626, 0.4642, 0.6309, 3.81346, 3.82555, 10.00, 25.77, 0.12, |
| 26.977, 0.4625, 0.6322, 3.81178, 3.82383, 10.00, 25.78, 0.12, |
| 27.327, 0.4608, 0.6336, 3.81011, 3.82213, 10.00, 25.79, 0.12, |
| 27.677, 0.4591, 0.6349, 3.80845, 3.82043, 10.00, 25.80, 0.12, |
| 28.028, 0.4574, 0.6362, 3.80679, 3.81874, 10.00, 25.81, 0.12, |
| 28.378, 0.4557, 0.6375, 3.80514, 3.81706, 10.00, 25.82, 0.12, |

---

|                                                               |
|---------------------------------------------------------------|
| 28.729, 0.4540, 0.6389, 3.80350, 3.81539, 10.00, 25.83, 0.12, |
| 29.079, 0.4523, 0.6402, 3.80187, 3.81373, 10.00, 25.84, 0.12, |
| 29.429, 0.4506, 0.6415, 3.80025, 3.81207, 10.00, 25.85, 0.12, |
| 29.780, 0.4489, 0.6428, 3.79863, 3.81042, 10.00, 25.86, 0.12, |
| 30.130, 0.4473, 0.6442, 3.79702, 3.80879, 10.00, 25.87, 0.12, |
| 30.480, 0.4456, 0.6455, 3.79542, 3.80716, 10.00, 25.88, 0.12, |
| 30.831, 0.4439, 0.6468, 3.79383, 3.80554, 10.00, 25.89, 0.12, |
| 31.181, 0.4422, 0.6482, 3.79225, 3.80393, 10.00, 25.90, 0.12, |
| 31.532, 0.4405, 0.6495, 3.79068, 3.80233, 10.00, 25.91, 0.12, |
| 31.882, 0.4388, 0.6508, 3.78912, 3.80074, 10.00, 25.92, 0.12, |
| 32.232, 0.4371, 0.6521, 3.78756, 3.79915, 10.00, 25.93, 0.12, |
| 32.583, 0.4354, 0.6535, 3.78602, 3.79758, 10.00, 25.94, 0.12, |
| 32.933, 0.4337, 0.6548, 3.78449, 3.79602, 10.00, 25.95, 0.11, |
| 33.284, 0.4320, 0.6561, 3.78297, 3.79447, 10.00, 25.96, 0.11, |
| 33.634, 0.4303, 0.6575, 3.78146, 3.79292, 10.00, 25.97, 0.11, |
| 33.984, 0.4286, 0.6588, 3.77996, 3.79139, 10.00, 25.98, 0.11, |
| 34.335, 0.4269, 0.6601, 3.77847, 3.78987, 10.00, 25.99, 0.11, |
| 34.685, 0.4252, 0.6614, 3.77700, 3.78837, 10.00, 25.99, 0.11, |
| 35.035, 0.4235, 0.6628, 3.77553, 3.78687, 10.00, 26.00, 0.11, |
| 35.386, 0.4218, 0.6641, 3.77408, 3.78538, 10.00, 26.01, 0.11, |
| 35.736, 0.4201, 0.6654, 3.77264, 3.78391, 10.00, 26.02, 0.11, |
| 36.087, 0.4184, 0.6667, 3.77122, 3.78245, 10.00, 26.03, 0.11, |
| 36.437, 0.4167, 0.6681, 3.76981, 3.78100, 10.00, 26.04, 0.11, |
| 36.787, 0.4151, 0.6694, 3.76841, 3.77956, 10.00, 26.05, 0.11, |
| 37.138, 0.4134, 0.6707, 3.76702, 3.77814, 10.00, 26.06, 0.11, |
| 37.488, 0.4117, 0.6721, 3.76565, 3.77673, 10.00, 26.07, 0.11, |
| 37.839, 0.4100, 0.6734, 3.76429, 3.77533, 10.00, 26.08, 0.11, |
| 38.189, 0.4083, 0.6747, 3.76295, 3.77395, 10.00, 26.09, 0.11, |
| 38.539, 0.4066, 0.6760, 3.76163, 3.77258, 10.00, 26.10, 0.11, |
| 38.890, 0.4049, 0.6774, 3.76031, 3.77123, 10.00, 26.11, 0.11, |
| 39.240, 0.4032, 0.6787, 3.75902, 3.76989, 10.00, 26.12, 0.11, |
| 39.590, 0.4015, 0.6800, 3.75773, 3.76856, 10.00, 26.13, 0.11, |
| 39.941, 0.3998, 0.6814, 3.75647, 3.76725, 10.00, 26.14, 0.11, |
| 40.291, 0.3981, 0.6827, 3.75522, 3.76595, 10.00, 26.15, 0.11, |
| 40.642, 0.3964, 0.6840, 3.75398, 3.76467, 10.00, 26.15, 0.11, |
| 40.992, 0.3947, 0.6853, 3.75276, 3.76340, 10.00, 26.16, 0.11, |
| 41.342, 0.3930, 0.6867, 3.75156, 3.76215, 10.00, 26.17, 0.11, |
| 41.693, 0.3913, 0.6880, 3.75037, 3.76091, 10.00, 26.18, 0.11, |
| 42.043, 0.3896, 0.6893, 3.74920, 3.75969, 10.00, 26.19, 0.10, |
| 42.394, 0.3879, 0.6906, 3.74804, 3.75849, 10.00, 26.20, 0.10, |
| 42.744, 0.3862, 0.6920, 3.74690, 3.75729, 10.00, 26.21, 0.10, |
| 43.094, 0.3845, 0.6933, 3.74578, 3.75612, 10.00, 26.22, 0.10, |
| 43.445, 0.3828, 0.6946, 3.74468, 3.75496, 10.00, 26.23, 0.10, |
| 43.795, 0.3812, 0.6960, 3.74359, 3.75382, 10.00, 26.23, 0.10, |

---

|                                                               |
|---------------------------------------------------------------|
| 44.145, 0.3795, 0.6973, 3.74252, 3.75269, 10.00, 26.24, 0.10, |
| 44.496, 0.3778, 0.6986, 3.74146, 3.75158, 10.00, 26.25, 0.10, |
| 44.846, 0.3761, 0.6999, 3.74042, 3.75048, 10.00, 26.26, 0.10, |
| 45.197, 0.3744, 0.7013, 3.73940, 3.74941, 10.00, 26.27, 0.10, |
| 45.547, 0.3727, 0.7026, 3.73840, 3.74834, 10.00, 26.28, 0.10, |
| 45.897, 0.3710, 0.7039, 3.73741, 3.74730, 10.00, 26.29, 0.10, |
| 46.248, 0.3693, 0.7053, 3.73643, 3.74627, 10.00, 26.29, 0.10, |
| 46.598, 0.3676, 0.7066, 3.73548, 3.74525, 10.00, 26.30, 0.10, |
| 46.949, 0.3659, 0.7079, 3.73454, 3.74425, 10.00, 26.31, 0.10, |
| 47.299, 0.3642, 0.7092, 3.73361, 3.74327, 10.00, 26.32, 0.10, |
| 47.649, 0.3625, 0.7106, 3.73270, 3.74230, 10.00, 26.33, 0.10, |
| 48.000, 0.3608, 0.7119, 3.73180, 3.74135, 10.00, 26.34, 0.10, |
| 48.350, 0.3591, 0.7132, 3.73092, 3.74042, 10.00, 26.34, 0.10, |
| 48.700, 0.3574, 0.7145, 3.73005, 3.73950, 10.00, 26.35, 0.10, |
| 49.051, 0.3557, 0.7159, 3.72920, 3.73860, 10.00, 26.36, 0.09, |
| 49.401, 0.3540, 0.7172, 3.72836, 3.73771, 10.00, 26.37, 0.09, |
| 49.752, 0.3523, 0.7185, 3.72752, 3.73684, 10.00, 26.38, 0.09, |
| 50.102, 0.3506, 0.7199, 3.72671, 3.73599, 10.00, 26.38, 0.09, |
| 50.452, 0.3490, 0.7212, 3.72590, 3.73515, 10.00, 26.39, 0.09, |
| 50.803, 0.3473, 0.7225, 3.72510, 3.73432, 10.00, 26.40, 0.09, |
| 51.153, 0.3456, 0.7238, 3.72431, 3.73351, 10.00, 26.41, 0.09, |
| 51.504, 0.3439, 0.7252, 3.72354, 3.73272, 10.00, 26.42, 0.09, |
| 51.854, 0.3422, 0.7265, 3.72277, 3.73194, 10.00, 26.42, 0.09, |
| 52.204, 0.3405, 0.7278, 3.72201, 3.73118, 10.00, 26.43, 0.09, |
| 52.555, 0.3388, 0.7291, 3.72126, 3.73042, 10.00, 26.44, 0.09, |
| 52.905, 0.3371, 0.7305, 3.72052, 3.72969, 10.00, 26.45, 0.09, |
| 53.255, 0.3354, 0.7318, 3.71979, 3.72897, 10.00, 26.45, 0.09, |
| 53.606, 0.3337, 0.7331, 3.71907, 3.72826, 10.00, 26.46, 0.09, |
| 53.956, 0.3320, 0.7345, 3.71836, 3.72756, 10.00, 26.47, 0.09, |
| 54.307, 0.3303, 0.7358, 3.71766, 3.72688, 10.00, 26.48, 0.09, |
| 54.657, 0.3286, 0.7371, 3.71697, 3.72621, 10.00, 26.49, 0.09, |
| 55.007, 0.3269, 0.7384, 3.71628, 3.72555, 10.00, 26.49, 0.09, |
| 55.358, 0.3252, 0.7398, 3.71560, 3.72490, 10.00, 26.50, 0.09, |
| 55.708, 0.3235, 0.7411, 3.71494, 3.72427, 10.00, 26.51, 0.09, |
| 56.059, 0.3218, 0.7424, 3.71428, 3.72364, 10.00, 26.52, 0.09, |
| 56.409, 0.3201, 0.7438, 3.71363, 3.72303, 10.00, 26.52, 0.09, |
| 56.759, 0.3184, 0.7451, 3.71298, 3.72242, 10.00, 26.53, 0.09, |
| 57.110, 0.3167, 0.7464, 3.71235, 3.72183, 10.00, 26.54, 0.09, |
| 57.460, 0.3151, 0.7477, 3.71172, 3.72124, 10.00, 26.55, 0.09, |
| 57.810, 0.3134, 0.7491, 3.71110, 3.72066, 10.00, 26.56, 0.09, |
| 58.161, 0.3117, 0.7504, 3.71049, 3.72009, 10.00, 26.56, 0.09, |
| 58.511, 0.3100, 0.7517, 3.70989, 3.71953, 10.00, 26.57, 0.09, |
| 58.862, 0.3083, 0.7530, 3.70930, 3.71897, 10.00, 26.58, 0.09, |
| 59.212, 0.3066, 0.7544, 3.70871, 3.71842, 10.00, 26.59, 0.09, |

---

|                                                               |
|---------------------------------------------------------------|
| 59.562, 0.3049, 0.7557, 3.70813, 3.71788, 10.00, 26.60, 0.09, |
| 59.913, 0.3032, 0.7570, 3.70755, 3.71733, 10.00, 26.60, 0.09, |
| 60.263, 0.3015, 0.7584, 3.70698, 3.71680, 10.00, 26.61, 0.09, |
| 60.614, 0.2998, 0.7597, 3.70642, 3.71626, 10.00, 26.62, 0.09, |
| 60.964, 0.2981, 0.7610, 3.70586, 3.71573, 10.00, 26.63, 0.09, |
| 61.314, 0.2964, 0.7623, 3.70531, 3.71520, 10.00, 26.64, 0.10, |
| 61.665, 0.2947, 0.7637, 3.70477, 3.71467, 10.00, 26.64, 0.10, |
| 62.015, 0.2930, 0.7650, 3.70422, 3.71414, 10.00, 26.65, 0.10, |
| 62.365, 0.2913, 0.7663, 3.70369, 3.71362, 10.00, 26.66, 0.10, |
| 62.716, 0.2896, 0.7677, 3.70315, 3.71309, 10.00, 26.67, 0.10, |
| 63.066, 0.2879, 0.7690, 3.70262, 3.71255, 10.00, 26.68, 0.10, |
| 63.417, 0.2862, 0.7703, 3.70208, 3.71202, 10.00, 26.69, 0.10, |
| 63.767, 0.2845, 0.7716, 3.70155, 3.71148, 10.00, 26.69, 0.10, |
| 64.117, 0.2828, 0.7730, 3.70102, 3.71094, 10.00, 26.70, 0.10, |
| 64.468, 0.2812, 0.7743, 3.70049, 3.71039, 10.00, 26.71, 0.10, |
| 64.818, 0.2795, 0.7756, 3.69995, 3.70984, 10.00, 26.72, 0.10, |
| 65.168, 0.2778, 0.7769, 3.69941, 3.70928, 10.00, 26.73, 0.10, |
| 65.519, 0.2761, 0.7783, 3.69887, 3.70872, 10.00, 26.74, 0.10, |
| 65.869, 0.2744, 0.7796, 3.69831, 3.70815, 10.00, 26.75, 0.10, |
| 66.220, 0.2727, 0.7809, 3.69775, 3.70757, 10.00, 26.75, 0.10, |
| 66.570, 0.2710, 0.7823, 3.69718, 3.70698, 10.00, 26.76, 0.10, |
| 66.920, 0.2693, 0.7836, 3.69661, 3.70638, 10.00, 26.77, 0.10, |
| 67.271, 0.2676, 0.7849, 3.69601, 3.70577, 10.00, 26.78, 0.10, |
| 67.621, 0.2659, 0.7862, 3.69541, 3.70515, 10.00, 26.79, 0.10, |
| 67.972, 0.2642, 0.7876, 3.69479, 3.70452, 10.00, 26.80, 0.10, |
| 68.322, 0.2625, 0.7889, 3.69416, 3.70388, 10.00, 26.81, 0.10, |
| 68.672, 0.2608, 0.7902, 3.69352, 3.70323, 10.00, 26.81, 0.10, |
| 69.023, 0.2591, 0.7916, 3.69286, 3.70257, 10.00, 26.82, 0.10, |
| 69.373, 0.2574, 0.7929, 3.69218, 3.70189, 10.00, 26.83, 0.10, |
| 69.723, 0.2557, 0.7942, 3.69149, 3.70120, 10.00, 26.84, 0.10, |
| 70.074, 0.2540, 0.7955, 3.69078, 3.70050, 10.00, 26.85, 0.10, |
| 70.424, 0.2523, 0.7969, 3.69006, 3.69979, 10.00, 26.86, 0.10, |
| 70.775, 0.2506, 0.7982, 3.68931, 3.69906, 10.00, 26.87, 0.10, |
| 71.125, 0.2490, 0.7995, 3.68856, 3.69831, 10.00, 26.87, 0.10, |
| 71.475, 0.2473, 0.8008, 3.68778, 3.69756, 10.00, 26.88, 0.10, |
| 71.826, 0.2456, 0.8022, 3.68699, 3.69679, 10.00, 26.89, 0.10, |
| 72.176, 0.2439, 0.8035, 3.68619, 3.69600, 10.00, 26.90, 0.10, |
| 72.527, 0.2422, 0.8048, 3.68537, 3.69520, 10.00, 26.91, 0.10, |
| 72.877, 0.2405, 0.8062, 3.68453, 3.69439, 10.00, 26.92, 0.10, |
| 73.227, 0.2388, 0.8075, 3.68368, 3.69356, 10.00, 26.93, 0.10, |
| 73.578, 0.2371, 0.8088, 3.68281, 3.69272, 10.00, 26.93, 0.10, |
| 73.928, 0.2354, 0.8101, 3.68193, 3.69186, 10.00, 26.94, 0.10, |
| 74.278, 0.2337, 0.8115, 3.68103, 3.69099, 10.00, 26.95, 0.10, |
| 74.629, 0.2320, 0.8128, 3.68012, 3.69011, 10.00, 26.96, 0.10, |

---

|                                                               |
|---------------------------------------------------------------|
| 74.979, 0.2303, 0.8141, 3.67919, 3.68921, 10.00, 26.97, 0.10, |
| 75.330, 0.2286, 0.8155, 3.67825, 3.68830, 10.00, 26.98, 0.10, |
| 75.680, 0.2269, 0.8168, 3.67730, 3.68737, 10.00, 26.99, 0.10, |
| 76.030, 0.2252, 0.8181, 3.67633, 3.68644, 10.00, 26.99, 0.10, |
| 76.381, 0.2235, 0.8194, 3.67535, 3.68548, 10.00, 27.00, 0.10, |
| 76.731, 0.2218, 0.8208, 3.67436, 3.68452, 10.00, 27.01, 0.10, |
| 77.082, 0.2201, 0.8221, 3.67336, 3.68354, 10.00, 27.02, 0.10, |
| 77.432, 0.2184, 0.8234, 3.67234, 3.68256, 10.00, 27.03, 0.10, |
| 77.782, 0.2167, 0.8247, 3.67131, 3.68156, 10.00, 27.04, 0.10, |
| 78.133, 0.2151, 0.8261, 3.67028, 3.68055, 10.00, 27.05, 0.10, |
| 78.483, 0.2134, 0.8274, 3.66923, 3.67952, 10.00, 27.06, 0.10, |
| 78.833, 0.2117, 0.8287, 3.66818, 3.67849, 10.00, 27.06, 0.10, |
| 79.184, 0.2100, 0.8301, 3.66711, 3.67745, 10.00, 27.07, 0.10, |
| 79.534, 0.2083, 0.8314, 3.66604, 3.67640, 10.00, 27.08, 0.10, |
| 79.885, 0.2066, 0.8327, 3.66496, 3.67534, 10.00, 27.09, 0.10, |
| 80.235, 0.2049, 0.8340, 3.66387, 3.67427, 10.00, 27.10, 0.10, |
| 80.585, 0.2032, 0.8354, 3.66277, 3.67319, 10.00, 27.11, 0.10, |
| 80.936, 0.2015, 0.8367, 3.66166, 3.67210, 10.00, 27.12, 0.10, |
| 81.286, 0.1998, 0.8380, 3.66055, 3.67101, 10.00, 27.13, 0.10, |
| 81.637, 0.1981, 0.8394, 3.65944, 3.66991, 10.00, 27.14, 0.10, |
| 81.987, 0.1964, 0.8407, 3.65832, 3.66880, 10.00, 27.14, 0.10, |
| 82.337, 0.1947, 0.8420, 3.65719, 3.66769, 10.00, 27.15, 0.10, |
| 82.688, 0.1930, 0.8433, 3.65606, 3.66657, 10.00, 27.16, 0.11, |
| 83.038, 0.1913, 0.8447, 3.65493, 3.66544, 10.00, 27.17, 0.11, |
| 83.388, 0.1896, 0.8460, 3.65379, 3.66431, 10.00, 27.18, 0.11, |
| 83.739, 0.1879, 0.8473, 3.65265, 3.66318, 10.00, 27.19, 0.11, |
| 84.089, 0.1862, 0.8486, 3.65150, 3.66204, 10.00, 27.20, 0.11, |
| 84.440, 0.1845, 0.8500, 3.65036, 3.66090, 10.00, 27.21, 0.11, |
| 84.790, 0.1829, 0.8513, 3.64921, 3.65976, 10.00, 27.22, 0.11, |
| 85.140, 0.1812, 0.8526, 3.64806, 3.65861, 10.00, 27.22, 0.11, |
| 85.491, 0.1795, 0.8540, 3.64690, 3.65746, 10.00, 27.23, 0.11, |
| 85.841, 0.1778, 0.8553, 3.64575, 3.65631, 10.00, 27.24, 0.11, |
| 86.192, 0.1761, 0.8566, 3.64459, 3.65516, 10.00, 27.25, 0.11, |
| 86.542, 0.1744, 0.8579, 3.64343, 3.65400, 10.00, 27.26, 0.11, |
| 86.892, 0.1727, 0.8593, 3.64227, 3.65285, 10.00, 27.27, 0.11, |
| 87.243, 0.1710, 0.8606, 3.64111, 3.65169, 10.00, 27.28, 0.11, |
| 87.593, 0.1693, 0.8619, 3.63994, 3.65053, 10.00, 27.29, 0.11, |
| 87.943, 0.1676, 0.8633, 3.63877, 3.64936, 10.00, 27.30, 0.11, |
| 88.294, 0.1659, 0.8646, 3.63760, 3.64820, 10.00, 27.31, 0.11, |
| 88.644, 0.1642, 0.8659, 3.63642, 3.64703, 10.00, 27.32, 0.11, |
| 88.995, 0.1625, 0.8672, 3.63524, 3.64586, 10.00, 27.32, 0.11, |
| 89.345, 0.1608, 0.8686, 3.63405, 3.64468, 10.00, 27.33, 0.11, |
| 89.695, 0.1591, 0.8699, 3.63285, 3.64351, 10.00, 27.34, 0.11, |
| 90.046, 0.1574, 0.8712, 3.63165, 3.64232, 10.00, 27.35, 0.11, |

---

|                                                                |
|----------------------------------------------------------------|
| 90.396, 0.1557, 0.8725, 3.63043, 3.64113, 10.00, 27.36, 0.11,  |
| 90.747, 0.1540, 0.8739, 3.62921, 3.63993, 10.00, 27.37, 0.11,  |
| 91.097, 0.1523, 0.8752, 3.62797, 3.63873, 10.00, 27.38, 0.11,  |
| 91.447, 0.1506, 0.8765, 3.62672, 3.63751, 10.00, 27.39, 0.11,  |
| 91.798, 0.1490, 0.8779, 3.62545, 3.63628, 10.00, 27.40, 0.11,  |
| 92.148, 0.1473, 0.8792, 3.62417, 3.63504, 10.00, 27.41, 0.11,  |
| 92.498, 0.1456, 0.8805, 3.62288, 3.63379, 10.00, 27.42, 0.11,  |
| 92.849, 0.1439, 0.8818, 3.62157, 3.63252, 10.00, 27.43, 0.11,  |
| 93.199, 0.1422, 0.8832, 3.62026, 3.63124, 10.00, 27.43, 0.11,  |
| 93.550, 0.1405, 0.8845, 3.61893, 3.62995, 10.00, 27.44, 0.11,  |
| 93.900, 0.1388, 0.8858, 3.61760, 3.62864, 10.00, 27.45, 0.11,  |
| 94.250, 0.1371, 0.8872, 3.61627, 3.62732, 10.00, 27.46, 0.11,  |
| 94.601, 0.1354, 0.8885, 3.61495, 3.62599, 10.00, 27.47, 0.11,  |
| 94.951, 0.1337, 0.8898, 3.61364, 3.62465, 10.00, 27.48, 0.11,  |
| 95.302, 0.1320, 0.8911, 3.61236, 3.62332, 10.00, 27.49, 0.11,  |
| 95.652, 0.1303, 0.8925, 3.61111, 3.62199, 10.00, 27.50, 0.11,  |
| 96.002, 0.1286, 0.8938, 3.60990, 3.62068, 10.00, 27.51, 0.11,  |
| 96.353, 0.1269, 0.8951, 3.60875, 3.61940, 10.00, 27.52, 0.11,  |
| 96.703, 0.1252, 0.8964, 3.60765, 3.61815, 10.00, 27.53, 0.10,  |
| 97.053, 0.1235, 0.8978, 3.60663, 3.61694, 10.00, 27.54, 0.10,  |
| 97.404, 0.1218, 0.8991, 3.60569, 3.61578, 10.00, 27.54, 0.10,  |
| 97.754, 0.1201, 0.9004, 3.60482, 3.61469, 10.00, 27.55, 0.10,  |
| 98.105, 0.1184, 0.9018, 3.60403, 3.61367, 10.00, 27.56, 0.10,  |
| 98.455, 0.1167, 0.9031, 3.60333, 3.61272, 10.00, 27.57, 0.09,  |
| 98.805, 0.1151, 0.9044, 3.60271, 3.61185, 10.00, 27.58, 0.09,  |
| 99.156, 0.1134, 0.9057, 3.60217, 3.61106, 10.00, 27.58, 0.09,  |
| 99.506, 0.1117, 0.9071, 3.60169, 3.61035, 10.00, 27.59, 0.09,  |
| 99.857, 0.1100, 0.9084, 3.60128, 3.60972, 10.00, 27.60, 0.08,  |
| 100.207, 0.1083, 0.9097, 3.60091, 3.60917, 10.00, 27.61, 0.08, |
| 100.557, 0.1066, 0.9110, 3.60059, 3.60869, 10.00, 27.61, 0.08, |
| 100.908, 0.1049, 0.9124, 3.60030, 3.60827, 10.00, 27.62, 0.08, |
| 101.258, 0.1032, 0.9137, 3.60003, 3.60790, 10.00, 27.63, 0.08, |
| 101.608, 0.1015, 0.9150, 3.59978, 3.60758, 10.00, 27.63, 0.08, |
| 101.959, 0.0998, 0.9164, 3.59953, 3.60730, 10.00, 27.64, 0.08, |
| 102.309, 0.0981, 0.9177, 3.59928, 3.60705, 10.00, 27.65, 0.08, |
| 102.660, 0.0964, 0.9190, 3.59903, 3.60682, 10.00, 27.65, 0.08, |
| 103.010, 0.0947, 0.9203, 3.59878, 3.60660, 10.00, 27.66, 0.08, |
| 103.360, 0.0930, 0.9217, 3.59851, 3.60638, 10.00, 27.67, 0.08, |
| 103.711, 0.0913, 0.9230, 3.59823, 3.60617, 10.00, 27.67, 0.08, |
| 104.061, 0.0896, 0.9243, 3.59794, 3.60595, 10.00, 27.68, 0.08, |
| 104.412, 0.0879, 0.9257, 3.59763, 3.60571, 10.00, 27.69, 0.08, |
| 104.762, 0.0862, 0.9270, 3.59730, 3.60547, 10.00, 27.69, 0.08, |
| 105.112, 0.0845, 0.9283, 3.59696, 3.60521, 10.00, 27.70, 0.08, |
| 105.463, 0.0829, 0.9296, 3.59659, 3.60492, 10.00, 27.71, 0.08, |

---

|                                                                |
|----------------------------------------------------------------|
| 105.813, 0.0812, 0.9310, 3.59620, 3.60462, 10.00, 27.71, 0.08, |
| 106.163, 0.0795, 0.9323, 3.59579, 3.60429, 10.00, 27.72, 0.08, |
| 106.514, 0.0778, 0.9336, 3.59535, 3.60394, 10.00, 27.73, 0.09, |
| 106.864, 0.0761, 0.9349, 3.59488, 3.60356, 10.00, 27.74, 0.09, |
| 107.215, 0.0744, 0.9363, 3.59439, 3.60316, 10.00, 27.74, 0.09, |
| 107.565, 0.0727, 0.9376, 3.59387, 3.60274, 10.00, 27.75, 0.09, |
| 107.915, 0.0710, 0.9389, 3.59331, 3.60228, 10.00, 27.76, 0.09, |
| 108.266, 0.0693, 0.9403, 3.59272, 3.60180, 10.00, 27.77, 0.09, |
| 108.616, 0.0676, 0.9416, 3.59209, 3.60128, 10.00, 27.77, 0.09, |
| 108.967, 0.0659, 0.9429, 3.59142, 3.60074, 10.00, 27.78, 0.09, |
| 109.317, 0.0642, 0.9442, 3.59069, 3.60016, 10.00, 27.79, 0.10, |
| 109.667, 0.0625, 0.9456, 3.58990, 3.59953, 10.00, 27.80, 0.10, |
| 110.018, 0.0608, 0.9469, 3.58905, 3.59886, 10.00, 27.81, 0.10, |
| 110.368, 0.0591, 0.9482, 3.58810, 3.59814, 10.00, 27.82, 0.10, |
| 110.718, 0.0574, 0.9496, 3.58706, 3.59735, 10.00, 27.83, 0.10, |
| 111.069, 0.0557, 0.9509, 3.58589, 3.59649, 10.00, 27.83, 0.11, |
| 111.419, 0.0540, 0.9522, 3.58457, 3.59554, 10.00, 27.84, 0.11, |
| 111.770, 0.0523, 0.9535, 3.58307, 3.59449, 10.00, 27.85, 0.12, |
| 112.120, 0.0506, 0.9549, 3.58134, 3.59330, 10.00, 27.86, 0.12, |
| 112.470, 0.0490, 0.9562, 3.57934, 3.59196, 10.00, 27.87, 0.13, |
| 112.821, 0.0473, 0.9575, 3.57701, 3.59042, 10.00, 27.89, 0.13, |
| 113.171, 0.0456, 0.9588, 3.57427, 3.58866, 10.00, 27.90, 0.14, |
| 113.522, 0.0439, 0.9602, 3.57103, 3.58661, 10.00, 27.91, 0.16, |
| 113.872, 0.0422, 0.9615, 3.56717, 3.58422, 10.00, 27.93, 0.17, |
| 114.222, 0.0405, 0.9628, 3.56257, 3.58140, 10.00, 27.94, 0.19, |
| 114.573, 0.0388, 0.9642, 3.55705, 3.57808, 10.00, 27.96, 0.21, |
| 114.923, 0.0371, 0.9655, 3.55042, 3.57413, 10.00, 27.98, 0.24, |
| 115.273, 0.0354, 0.9668, 3.54242, 3.56941, 10.00, 28.00, 0.27, |
| 115.624, 0.0337, 0.9681, 3.53276, 3.56376, 10.00, 28.03, 0.31, |
| 115.974, 0.0320, 0.9695, 3.52105, 3.55696, 10.00, 28.06, 0.36, |
| 116.325, 0.0303, 0.9708, 3.50685, 3.54877, 10.00, 28.10, 0.42, |
| 116.675, 0.0286, 0.9721, 3.48960, 3.53887, 10.00, 28.14, 0.49, |
| 117.025, 0.0269, 0.9735, 3.46861, 3.52688, 10.00, 28.19, 0.58, |
| 117.376, 0.0252, 0.9748, 3.44307, 3.51234, 10.00, 28.25, 0.69, |
| 117.726, 0.0235, 0.9761, 3.43195, 3.49468, 10.00, 28.32, 0.83, |
| 118.077, 0.0218, 0.9774, 3.42400, 3.47319, 10.00, 28.40, 0.99, |
| 118.427, 0.0201, 0.9788, 3.40769, 3.44704, 10.00, 28.50, 1.19, |
| 118.777, 0.0184, 0.9801, 3.37117, 3.41518, 10.00, 28.63, 1.44, |
| 119.128, 0.0168, 0.9814, 3.33214, 3.37632, 10.00, 28.78, 1.74, |
| 119.478, 0.0151, 0.9827, 3.29779, 3.32892, 10.00, 28.96, 2.11, |
| 119.828, 0.0134, 0.9841, 3.24471, 3.27105, 10.00, 29.17, 2.56, |
| 120.000, 0.0125, 0.9847, 3.23620, 3.23822, 10.00, 29.29, 2.82, |
